# Supplementary material
Source: publisher figshare collection journal article supplement (https://adisjournals.figshare.com/articles/dataset/_/6026498)
Supplement: Supplementary file 1 [file 1]

## Tiotropium Respimat® Versus HandiHaler®: Comparison of Bronchodilator Efficacy of Various Doses in Clinical Trials

Calverley PMA, Könen-Bergmann M, Richard F, Bell S, Hohlfeld JM.  
Adv Ther. 2016.

This slide deck represents the opinions of the authors. Sponsorship for this study was funded by Boehringer Ingelheim. Scientific writing and editorial support was provided by Godfrey Lisk at PAREXEL and funded by Boehringer Ingelheim. For a full list of acknowledgments and disclosures for all authors of this article, please see the full text online. ©The Author(s) 2016. Creative Commons Attribution Noncommercial License (CC BY-NC).

## Abbreviations

*CI* confidence interval

*COPD* chronic obstructive pulmonary disease

*FEV<sub>1</sub>* forced expiratory volume in 1 second

*FVC* forced vital capacity

*PK* pharmacokinetic

*TIOSPIR*® TIOtropium Safety and Performance In Respimat®

## Introduction

- The long-acting anticholinergic, or muscarinic antagonist, tiotropium bromide (SPIRIVA®) provides significant clinical benefits for maintenance treatment of COPD, including reduction of exacerbations [1-4]
- Tiotropium is available in two formulations:
  - Dry-powder formulation: HandiHaler® (18 µg once daily)
  - Aqueous solution: Respimat® Soft Mist™ Inhaler (5 µg once daily)
- Existing studies have compared the efficacy of HandiHaler® with different doses of Respimat®, but a comprehensive review is lacking
- This review summarizes the spirometric dose-response relationship for tiotropium administered via Respimat® (1.25, 2.5, 5, 10 or 20 µg) or via HandiHaler® 18 µg

1. Bateman ED, Tashkin D, Siafakas N, et al. *Respir Med*. 2010;104(10):1460-72; 2. Cooper CB, Celli BR, Jardim JR, et al. *Chest*. 2013;144(2):490-7; 3. Tashkin DP, Celli B, Senn S, et al. *N Engl J Med*. 2008;359(15):1543-54; 4. Vogelmeier C, Hederer B, Glaab T, et al. *N Engl J Med*. 2011;364(12):1093-103.

## Summary of Study Designs

- All dose-response studies of Respimat<sup>®</sup> conducted in comparison with HandiHaler<sup>®</sup> were included in this analysis

| Study                                          | Study design                                                                                                                               | Treatment groups and size                                                  | End points<br>(1°: primary; 2°: secondary)                                                                                                  |
|------------------------------------------------|--------------------------------------------------------------------------------------------------------------------------------------------|----------------------------------------------------------------------------|---------------------------------------------------------------------------------------------------------------------------------------------|
| Study 1:<br>NCT02175342                        | Multicenter, randomized, double-blind within device, parallel-group, placebo-controlled, 3-week dose-ranging study                         | Respimat 1.25, 2.5, 5, 10, or 20 µg; HandiHaler 18 µg; or placebo: N = 202 | 1°: Change from baseline in trough FEV <sub>1</sub> on day 21<br>2°: FVC, as above                                                          |
| Study 2 and 3:<br>NCT00239447 &<br>NCT00281567 | Prespecified, pooled analysis of two identical, double-blind, double-dummy, 4-week crossover studies                                       | Respimat 5 or 10 µg, HandiHaler 18 µg, or placebo: N = 207                 | 1°: Trough FEV <sub>1</sub> response (change from baseline to the end of each 4-week treatment period [day 29])<br>2°: Trough FVC, as above |
| Study 4:<br>NCT00292448                        | Randomized, double-blind, double-dummy, two-way, 4-week crossover study                                                                    | Respimat 5 µg and HandiHaler 18 µg: N = 157                                | 1°: Trough FEV <sub>1</sub> response from baseline to day 29<br>2°: Trough FVC, as above                                                    |
| Study 5:<br>NCT01126437                        | Substudy of a randomized, double-blind, double-dummy, parallel-group, event-driven trial of 2–3 years' duration in patients with COPD      | Respimat 5 and 2.5 µg versus HandiHaler 18 µg: N = 1370                    | Trough FEV <sub>1</sub> and FVC from weeks 24–120                                                                                           |
| Study 6:<br>NCT01222533                        | Multicenter, placebo-controlled, randomized, double-blind (within Respimat groups), five-way crossover trial with 4-week treatment periods | Respimat 1.25, 2.5, and 5 µg with HandiHaler 18 µg and placebo: N = 154    | 1°: PK assessments<br>2°: Trough FEV <sub>1</sub> and FVC.                                                                                  |

## Respimat® 5 µg was noninferior to HandiHaler® 18 µg for differences in adjusted mean trough FEV<sub>1</sub> response

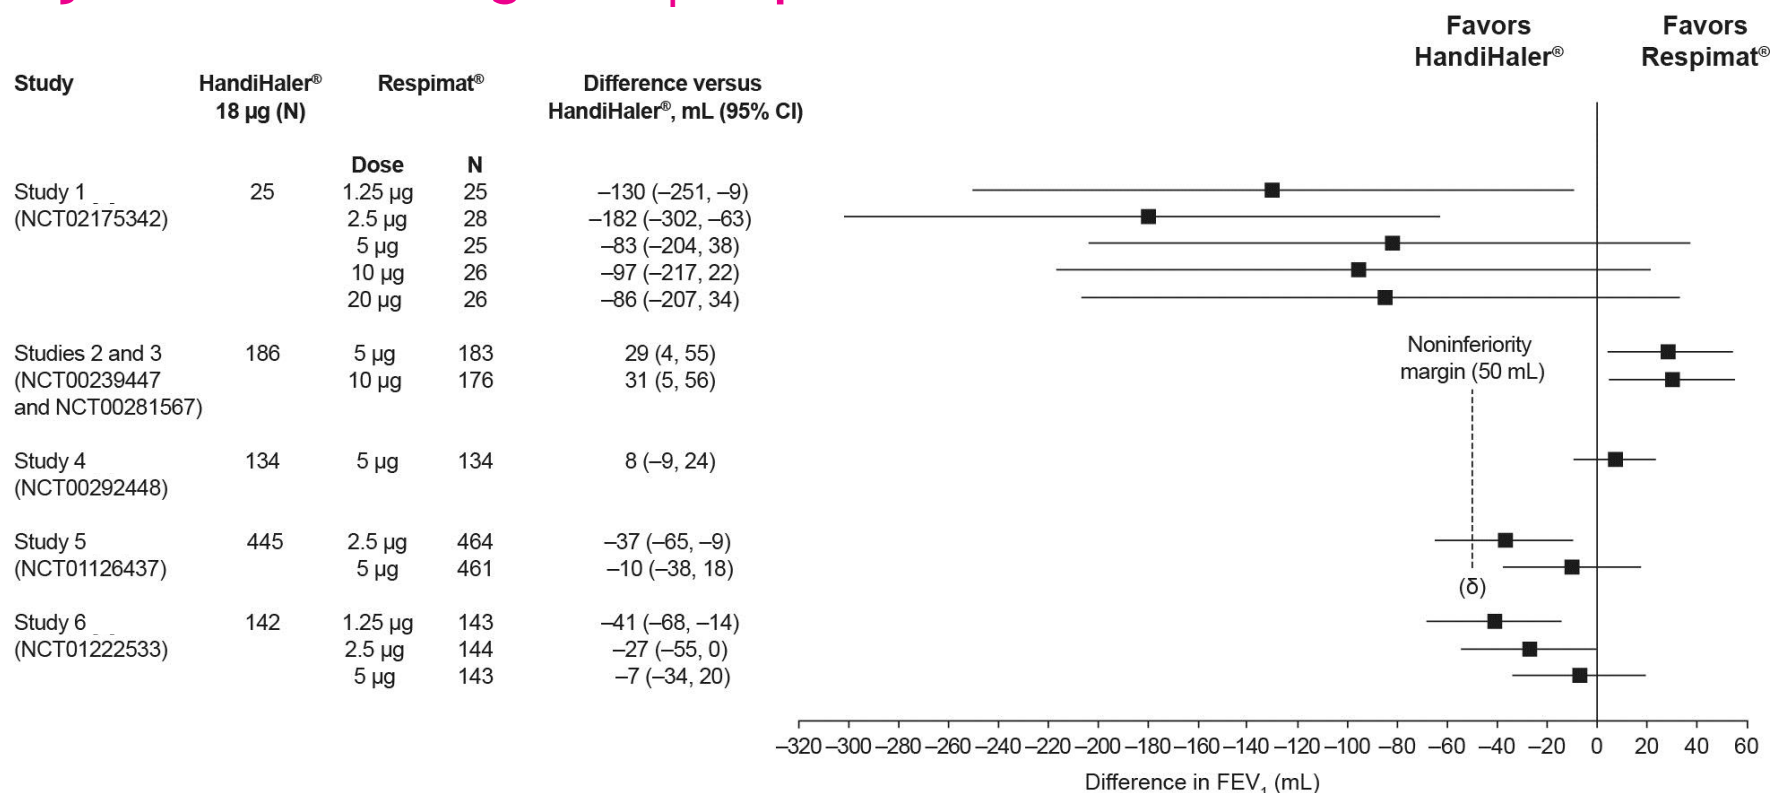

Note: the mean responses to Respimat® in Study 1 were lower than observed in the other studies included in this analysis. Possible explanations for these results are differences in study design, including a smaller sample size, the lack of a double-dummy design, and the timing of the pulmonary function test (assessed earlier at 3 weeks vs. 4 weeks in other studies). In Studies 2-5, noninferiority of Respimat® vs HandiHaler® was evaluated using 95% CI compared with a noninferiority delta of 50 mL.

## Respimat® 5 µg was noninferior to HandiHaler® 18 µg for differences in adjusted mean trough FVC response

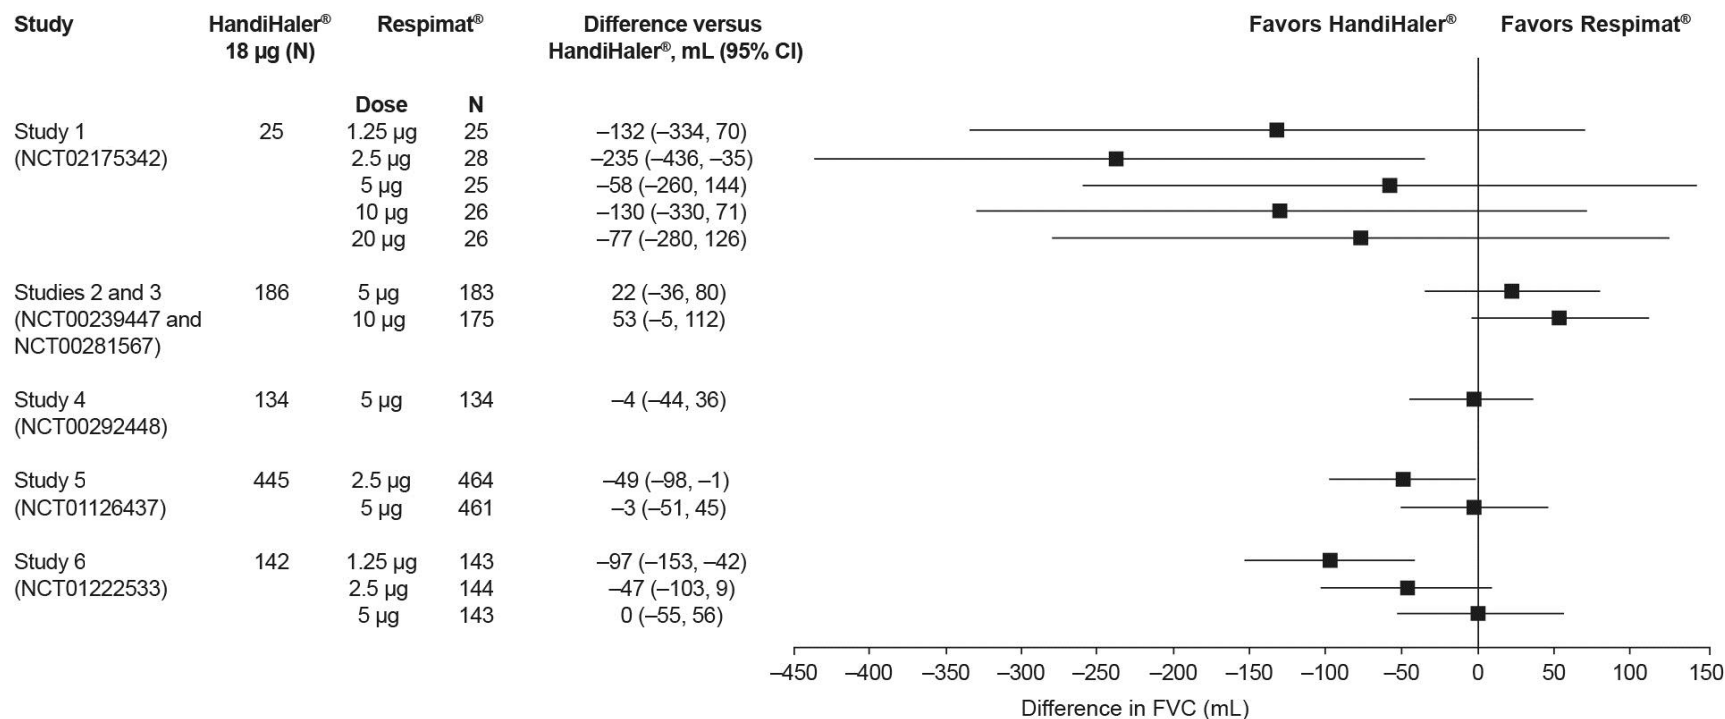

Note: the mean responses to Respimat® in Study 1 were lower than observed in the other studies included in this analysis. Possible explanations for these results are differences in study design, including a smaller sample size, the lack of a double-dummy design, and the timing of the pulmonary function test (assessed earlier at 3 weeks vs. 4 weeks in other studies).

## Conclusions

- The results from the six tiotropium trials demonstrated a similar bronchodilator efficacy for Respimat® 5 µg and HandiHaler® 18 µg
- Reduced bronchodilator efficacy was observed with lower doses of Respimat® (1.25 and 2.5 µg)
- These findings support the use of the marketed once-daily dose of Respimat® 5 µg (2 puffs of 2.5 µg) for the maintenance treatment of patients with COPD

## Acknowledgments

All studies reported here were funded by Boehringer Ingelheim. The article processing charges and open access fee for this publication were funded by Boehringer Ingelheim. All named authors meet the International Committee of Medical Journal Editors (ICMJE) criteria for authorship for this manuscript, take responsibility for the integrity of the work as a whole, and have given final approval to the version to be published. Scientific writing and editorial support was provided by Godfrey Lisk at PAREXEL and funded by Boehringer Ingelheim.



## Acknowledgments

### Disclosures

Peter M.A. Calverley received honoraria for advising Boehringer Ingelheim on clinical trials and has served on the Boehringer Ingelheim Advisory Board for TIOSPIR®. Michael Könen-Bergmann is an employee of Boehringer Ingelheim. Frank Richard was an employee of Boehringer Ingelheim at the time of writing this manuscript, but he is currently an employee of Sandoz/Hexal AG. Susan Bell is an employee of Boehringer Ingelheim. Jens M. Hohlfeld received honoraria for advising Boehringer Ingelheim on clinical trials and has served on the Boehringer Ingelheim Advisory Board for Early Clinical Development.

### Compliance with Ethics Guidelines

The analysis in this article is based on previously conducted studies, and does not involve any new studies of human or animal subjects performed by any of the authors.

## Copyright

Copyright © The Authors 2016.

This slide deck is distributed under the terms of the Creative Commons Attribution Noncommercial License which permits any noncommercial use, distribution, and reproduction in any medium, provided the original author(s) and the source are credited.
